# Supplementary material for: Ancillary ligand electro-activity effects towards phenyl acetylene homocoupling reaction by a nickel(ii) complex of a non-innocent O-amino phenol ligand: a mechanistic insight
Source: Royal Society of Chemistry journal article supplement (doi:10.1039/d0ra04362a), 2020-01-01
Supplement: d0ra04362a1.pdf [file d0ra04362a1.pdf]

## Supporting Information

### The Role of Ligand Electro-activity towards Phenyl acetylene Homocoupling Reaction by a Nickel(II) Complex of a Non-innocent *O*-amino phenol Ligand: A Mechanistic Insight

Mina Nasibipour <sup>a</sup>, Elham Safaei <sup>a,\*</sup>, Marziyeh Sadat Masoumpour<sup>b</sup>, Andrzej Wojtczak <sup>c</sup>

<sup>a</sup> Department of Chemistry, College of Sciences, Shiraz University, 71454, Shiraz, Iran.

<sup>b</sup> Nicolaus Copernicus University, Faculty of Chemistry, 87-100 Torun, Poland

#### Correspondence

Elham Safaei, Department of Chemistry, College of Sciences, Shiraz University, Shiraz, 71454, Iran

Email: e.safaei@shirazu.ac.ir

| contents                                                                                                         | page |
|------------------------------------------------------------------------------------------------------------------|------|
| Figure S1: IR spectrum of H <sub>2</sub> L <sup>NAP</sup>                                                        | S1   |
| Figure S2: IR spectrum of Ni <sup>II</sup> L <sub>2</sub> <sup>NIS</sup>                                         | S1   |
| Figure S3: <sup>1</sup> H NMR spectrum of Ni <sup>II</sup> L <sub>2</sub> <sup>NIS</sup>                         | S2   |
| Figure S4: <sup>15</sup> N NMR spectrum of Ni <sup>II</sup> L <sub>2</sub> <sup>NIS</sup>                        | S2   |
| Table S1: Crystallographic data and structure refinement                                                         | S3   |
| Table S2: Bond distances (Å) and bond angles (°)                                                                 | S4   |
| Table S3: Torsion angles [°] for Ni <sup>II</sup> L <sub>2</sub> <sup>NIS</sup>                                  | S5   |
| Figure S5: <sup>1</sup> H NMR and <sup>13</sup> C NMR spectrum of 1,4-diphenyl buta-1,3-diyne                    | S8   |
| Figure S7: <sup>1</sup> H NMR and <sup>13</sup> C NMR spectrum of 1,4-di(pyridin-2-yl)buta-1,3-diyne             | S9   |
| Figure S6: <sup>1</sup> H NMR and <sup>13</sup> C NMR spectrum of 1,4-bis( <i>p</i> -fluorophenyl)buta-1,3-diyne | S10  |
| Figure S8: <sup>1</sup> H NMR and <sup>13</sup> C NMR spectrum of 1,4-bis( <i>p</i> -tolyl)buta-1,3-diyne        | S9   |
| Figure S9: <sup>1</sup> H NMR and <sup>13</sup> C NMR spectrum of 1,4-bis(4-methoxyphenyl)buta-1,3-diyne         | S10  |
| Figure S10: <sup>1</sup> H NMR and <sup>13</sup> C NMR spectrum of 1,4-bis(2-chlorophenyl)buta-1,3-diyne         | S11  |

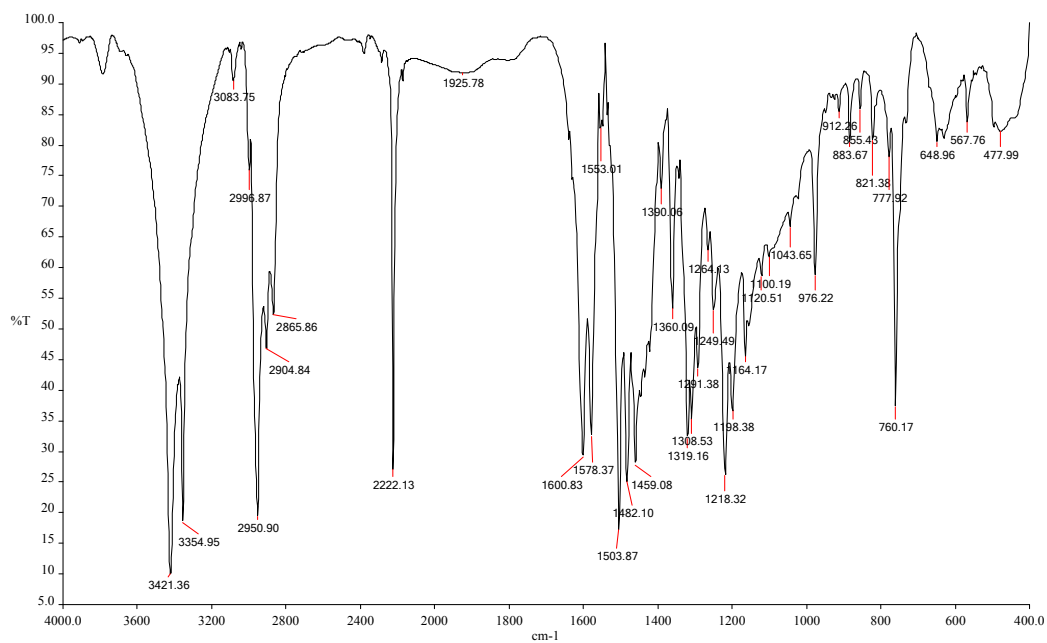

Figure S1 IR spectrum of  $H_2L^{NAP}$

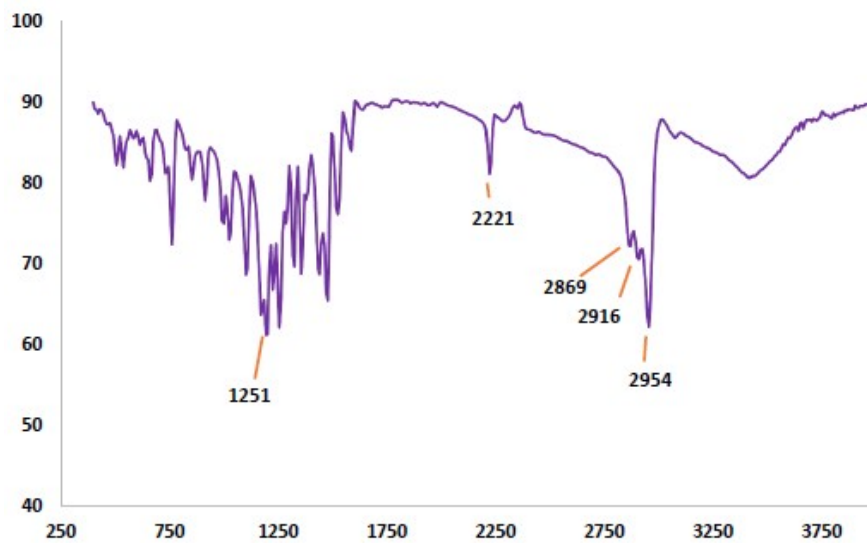

Figure S2 IR spectrum of  $Ni(II)L_2^{NIS}$

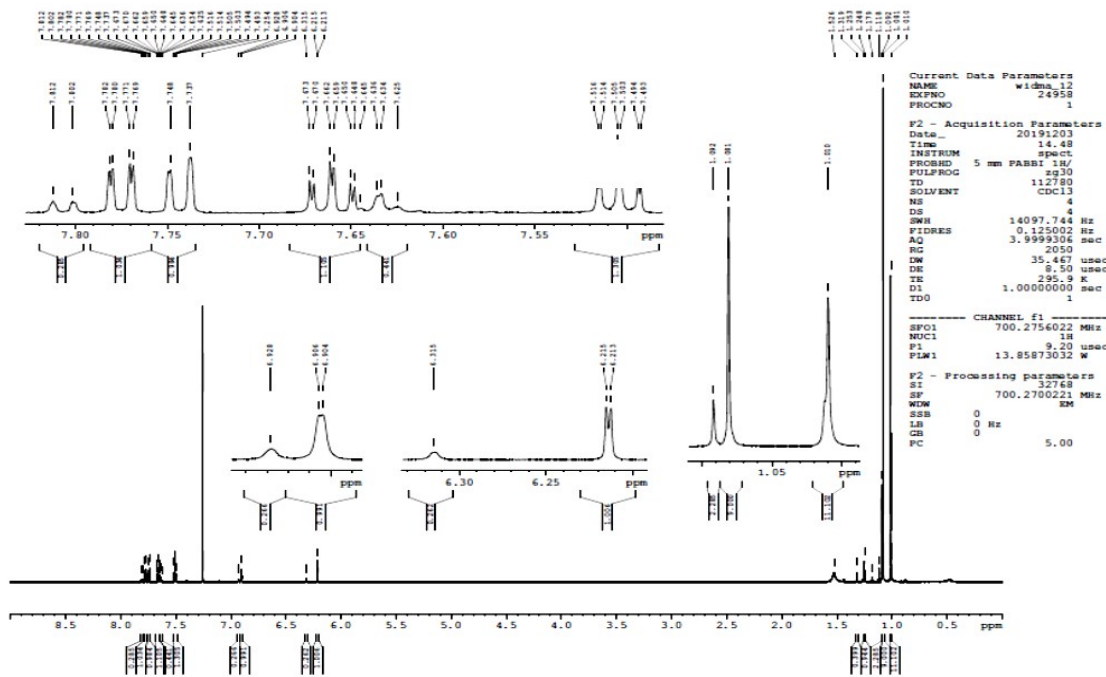

Figure S3  $^1\text{H}$  NMR spectrum of  $\text{Ni}^{\text{II}}\text{L}_2^{\text{NIS}}$

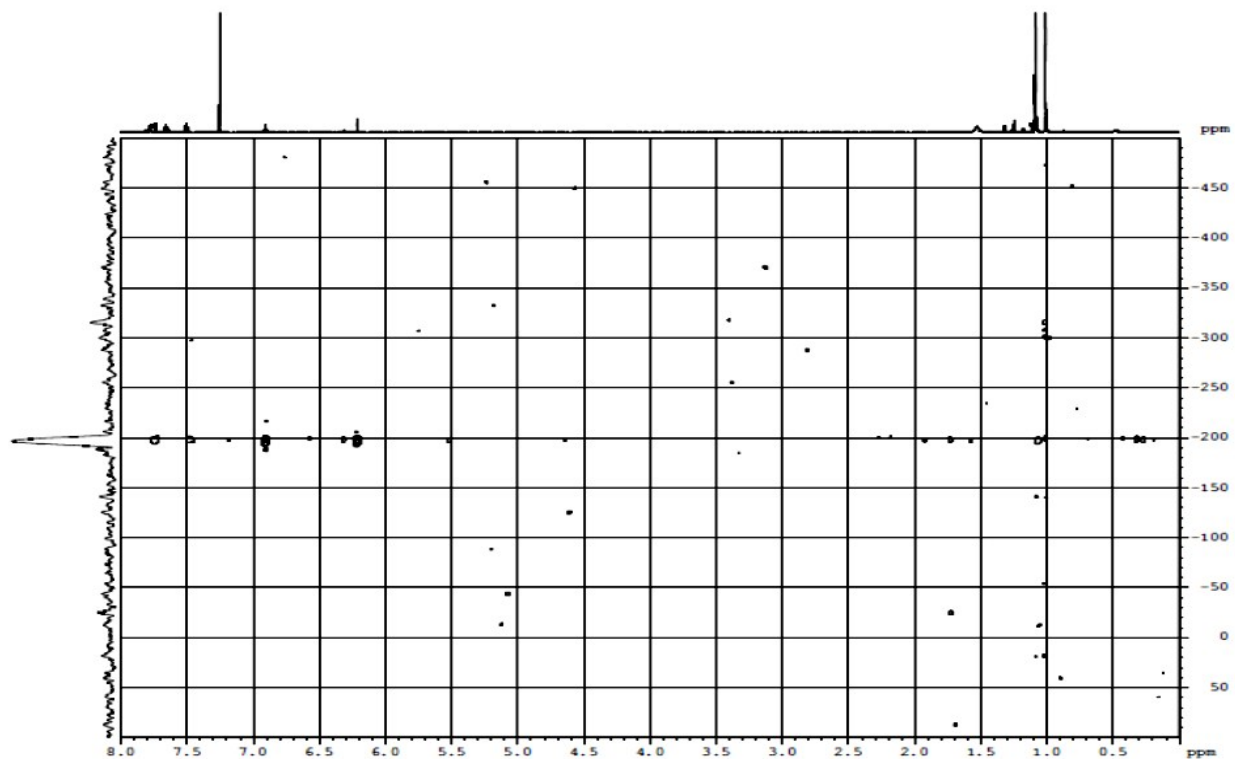

Figure S4  $^{15}\text{N}$  NMR spectrum of  $\text{Ni}^{\text{II}}\text{L}_2^{\text{NIS}}$

**Table S1** Crystallographic data for Ni<sup>II</sup>L<sub>2</sub>NiS.

|                                                |                                                                                                        |
|------------------------------------------------|--------------------------------------------------------------------------------------------------------|
| Empirical formula                              | C21 H24 N2 Ni0.50 O                                                                                    |
| Formula weight                                 | 349.78                                                                                                 |
| Crystal system                                 | Monoclinic                                                                                             |
| Space group                                    | P2 <sub>1</sub> /c                                                                                     |
| Unit cell dimensions                           | a = 16.469(2) b = 8.1558(8)<br>c = 16.897(2)<br>$\alpha$ = 90. $\beta$ = 118.733(17)<br>$\delta$ = 90. |
| Volume                                         | 1990.1(5)                                                                                              |
| Z                                              | 4                                                                                                      |
| Temperature                                    | 293(2) K                                                                                               |
| Wavelength; Å                                  | 0.71073                                                                                                |
| Density (calculated)                           | 1.167 Mg/m <sup>3</sup>                                                                                |
| Crystal size                                   | 0.529 x 0.356 x 0.122 mm <sup>3</sup>                                                                  |
| Absorption coefficient                         | 0.525 mm <sup>-1</sup>                                                                                 |
| F(000)                                         | 744                                                                                                    |
| Theta range for data collection                | 2.412 to 28.446°.                                                                                      |
| Index ranges                                   | -20 <= h <= 21, -10 <= k <= 10, -21 <= l <= 19                                                         |
| Reflections collected                          | 13001                                                                                                  |
| Independent reflections                        | 4554 [R(int) = 0.0568]                                                                                 |
| Completeness to theta = 25.242°                | 99.8 %                                                                                                 |
| Absorption correction                          | Analytical                                                                                             |
| Max. and min. transmission                     | 0.939 and 0.807                                                                                        |
| Refinement method                              | Full-matrix least-squares on F <sup>2</sup>                                                            |
| Data / restraints / parameters                 | 4554 / 0 / 223                                                                                         |
| Goodness-of-fit on F <sup>2</sup>              | 0.977                                                                                                  |
| Final R indices [I > 2sigma(I)]                | R1 = 0.0462, wR2 = 0.1037                                                                              |
| R indices (all data)                           | R1 = 0.0742, wR2 = 0.1146                                                                              |
| Largest diff. peak and hole; e.Å <sup>-3</sup> | 0.357 and -0.252                                                                                       |

**Table S2.** Selected bond lengths [Å] and angles [°] for Ni<sup>II</sup>L<sub>2</sub><sup>NIS</sup>.

|          |               |
|----------|---------------|
| Ni1-O1   | O1-Ni1-O1#1   |
| Ni1-O1#1 | O1-Ni1-N1     |
| Ni1-N1   | O1#1-Ni1-N1   |
| Ni1-N1#1 | O1-Ni1-N1#1   |
| O1-C1    | O1#1-Ni1-N1#1 |
| C1-C2    | N1-Ni1-N1#1   |
| C1-C6    | C1-O1-Ni1     |
| C2-C3    | O1-C1-C2      |
| C2-C14   | O1-C1-C6      |
| C3-C4    | C2-C1-C6      |
| C4-C5    | C3-C2-C1      |
| C4-C18   | C3-C2-C14     |
| C5-C6    | C1-C2-C14     |
| C6-N1    | C2-C3-C4      |
| N1-C7    | C5-C4-C3      |
| C7-C8    | C5-C4-C18     |
| C7-C12   | C3-C4-C18     |
| C8-C9    | C4-C5-C6      |
| C9-C10   | N1-C6-C5      |
| C10-C11  | N1-C6-C1      |
| C11-C12  | C5-C6-C1      |
| C12-C13  | C6-N1-C7      |
| C13-N2   | C6-N1-Ni1     |
| C14-C16  | C7-N1-Ni1     |
| C14-C17  | C8-C7-C12     |
| C14-C15  | C8-C7-N1      |
| C18-C19  | C12-C7-N1     |
| C18-C21  | C9-C8-C7      |
| C18-C20  | C10-C9-C8     |
|          | C11-C10-C9    |
|          | C10-C11-C12   |
|          | C7-C12-C11    |

C7-C12-C13  
 C11-C12-C13  
 N2-C13-C12  
 C16-C14-C17  
 C16-C14-C2  
 C17-C14-C2  
 C16-C14-C15  
 C17-C14-C15  
 C2-C14-C15  
 C19-C18-C21  
 C19-C18-C4  
 C21-C18-C4  
 C19-C18-C20  
 C21-C18-C20  
 C4-C18-C20

Symmetry transformations used to generate equivalent atoms: #1-x,-y,-z

**Table S3.** Torsion angles [°] for Ni<sup>II</sup>L<sub>2</sub><sup>NIS</sup>.

|                        |             |
|------------------------|-------------|
| N(1)-Ni(1)-O(1)-C(1)   | 0.92(14)    |
| N(1)#1-Ni(1)-O(1)-C(1) | -179.08(14) |
| Ni(1)-O(1)-C(1)-C(2)   | -178.96(15) |
| Ni(1)-O(1)-C(1)-C(6)   | -0.2(2)     |
| O(1)-C(1)-C(2)-C(3)    | 179.02(19)  |
| C(6)-C(1)-C(2)-C(3)    | 0.3(3)      |
| O(1)-C(1)-C(2)-C(14)   | -3.1(3)     |
| C(6)-C(1)-C(2)-C(14)   | 178.12(19)  |
| C(1)-C(2)-C(3)-C(4)    | 1.0(3)      |
| C(14)-C(2)-C(3)-C(4)   | -176.8(2)   |
| C(2)-C(3)-C(4)-C(5)    | -1.4(3)     |
| C(2)-C(3)-C(4)-C(18)   | 179.9(2)    |
| C(3)-C(4)-C(5)-C(6)    | 0.5(3)      |
| C(18)-C(4)-C(5)-C(6)   | 179.0(2)    |
| C(4)-C(5)-C(6)-N(1)    | -178.0(2)   |

|                         |             |
|-------------------------|-------------|
| C(4)-C(5)-C(6)-C(1)     | 0.8(3)      |
| O(1)-C(1)-C(6)-N(1)     | -1.1(3)     |
| C(2)-C(1)-C(6)-N(1)     | 177.79(17)  |
| O(1)-C(1)-C(6)-C(5)     | 179.97(17)  |
| C(2)-C(1)-C(6)-C(5)     | -1.2(3)     |
| C(5)-C(6)-N(1)-C(7)     | -1.9(3)     |
| C(1)-C(6)-N(1)-C(7)     | 179.18(16)  |
| C(5)-C(6)-N(1)-Ni(1)    | -179.34(16) |
| C(1)-C(6)-N(1)-Ni(1)    | 1.8(2)      |
| O(1)-Ni(1)-N(1)-C(6)    | -1.52(14)   |
| O(1)#1-Ni(1)-N(1)-C(6)  | 178.47(14)  |
| O(1)-Ni(1)-N(1)-C(7)    | -178.79(16) |
| O(1)#1-Ni(1)-N(1)-C(7)  | 1.21(16)    |
| C(6)-N(1)-C(7)-C(8)     | -68.7(2)    |
| Ni(1)-N(1)-C(7)-C(8)    | 108.40(19)  |
| C(6)-N(1)-C(7)-C(12)    | 114.0(2)    |
| Ni(1)-N(1)-C(7)-C(12)   | -68.9(2)    |
| C(12)-C(7)-C(8)-C(9)    | 0.4(3)      |
| N(1)-C(7)-C(8)-C(9)     | -176.91(19) |
| C(7)-C(8)-C(9)-C(10)    | -0.1(3)     |
| C(8)-C(9)-C(10)-C(11)   | -0.6(4)     |
| C(9)-C(10)-C(11)-C(12)  | 1.0(4)      |
| C(8)-C(7)-C(12)-C(11)   | 0.1(3)      |
| N(1)-C(7)-C(12)-C(11)   | 177.43(18)  |
| C(8)-C(7)-C(12)-C(13)   | 179.59(18)  |
| N(1)-C(7)-C(12)-C(13)   | -3.1(3)     |
| C(10)-C(11)-C(12)-C(7)  | -0.8(3)     |
| C(10)-C(11)-C(12)-C(13) | 179.7(2)    |
| C(3)-C(2)-C(14)-C(16)   | 111.0(2)    |
| C(1)-C(2)-C(14)-C(16)   | -66.6(3)    |
| C(3)-C(2)-C(14)-C(17)   | -128.8(2)   |
| C(1)-C(2)-C(14)-C(17)   | 53.5(3)     |
| C(3)-C(2)-C(14)-C(15)   | -7.8(3)     |
| C(1)-C(2)-C(14)-C(15)   | 174.5(2)    |
| C(5)-C(4)-C(18)-C(19)   | 11.2(3)     |
| C(3)-C(4)-C(18)-C(19)   | -170.3(2)   |



|                       |           |
|-----------------------|-----------|
| C(5)-C(4)-C(18)-C(21) | -110.2(3) |
| C(3)-C(4)-C(18)-C(21) | 68.4(3)   |
| C(5)-C(4)-C(18)-C(20) | 130.1(2)  |
| C(3)-C(4)-C(18)-C(20) | -51.3(3)  |

---

Symmetry transformations used to generate equivalent atoms:

#1 -x,-y+1,-z

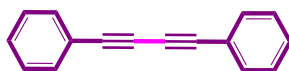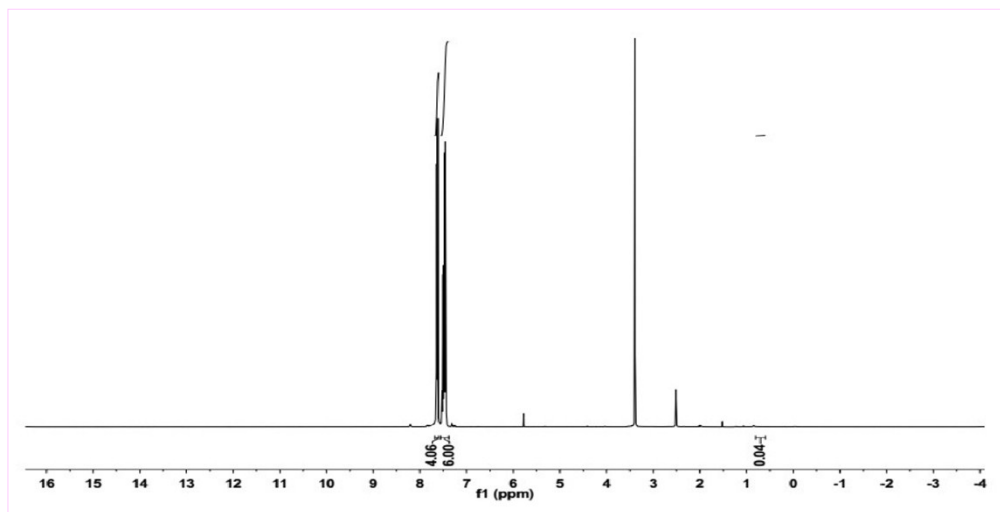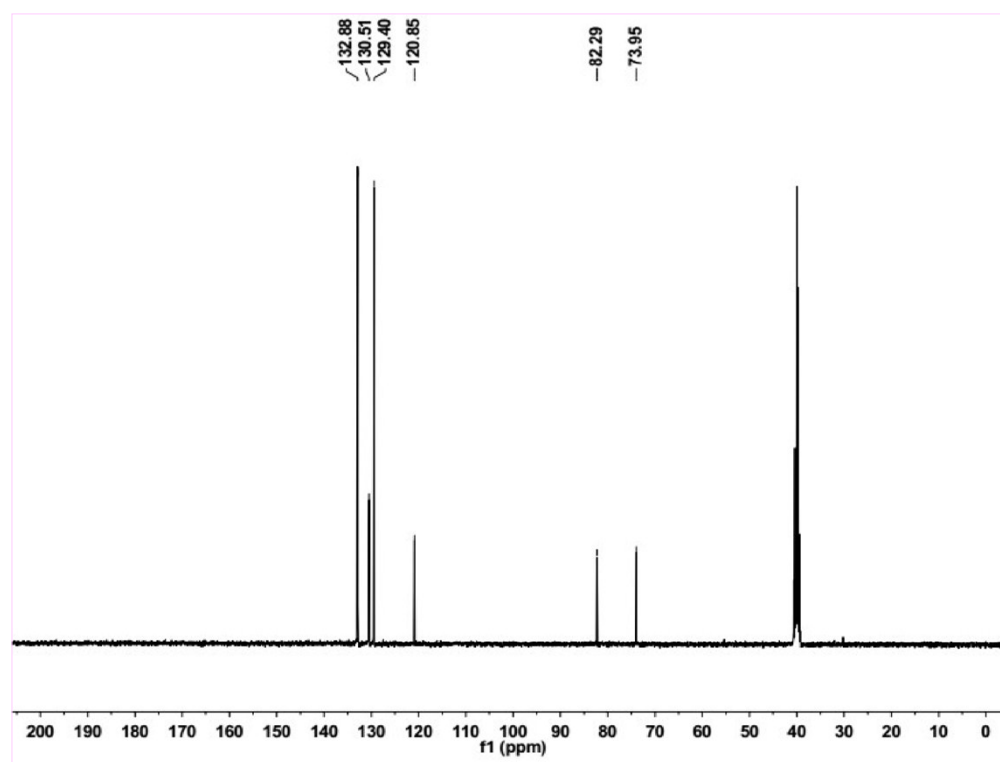

Figure S5 <sup>1</sup>H NMR and <sup>13</sup>C NMR spectra of 1,4-diphenyl buta-1,3-diyne

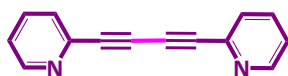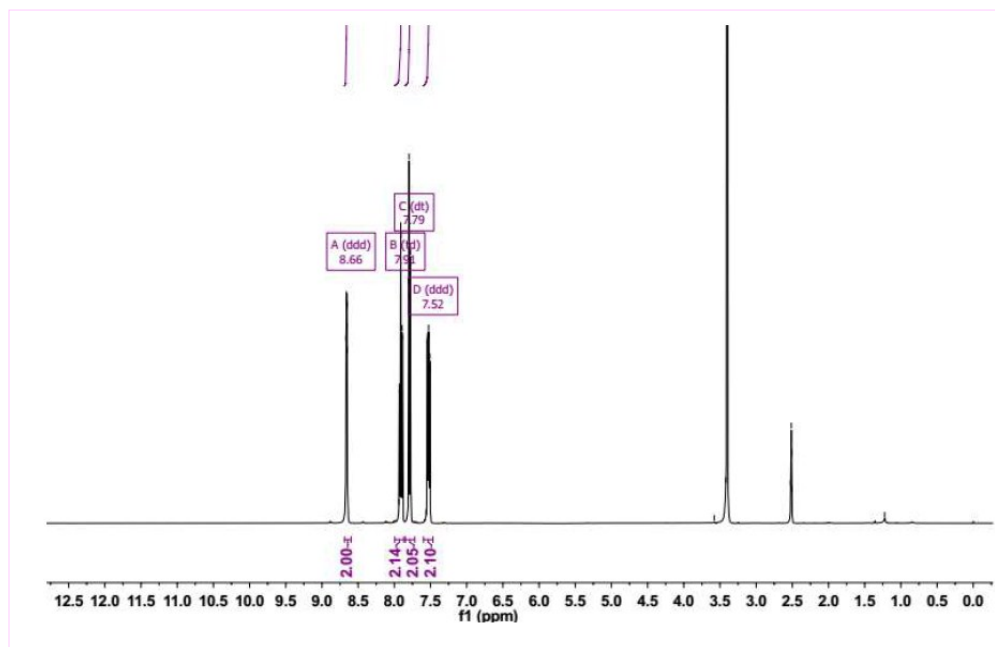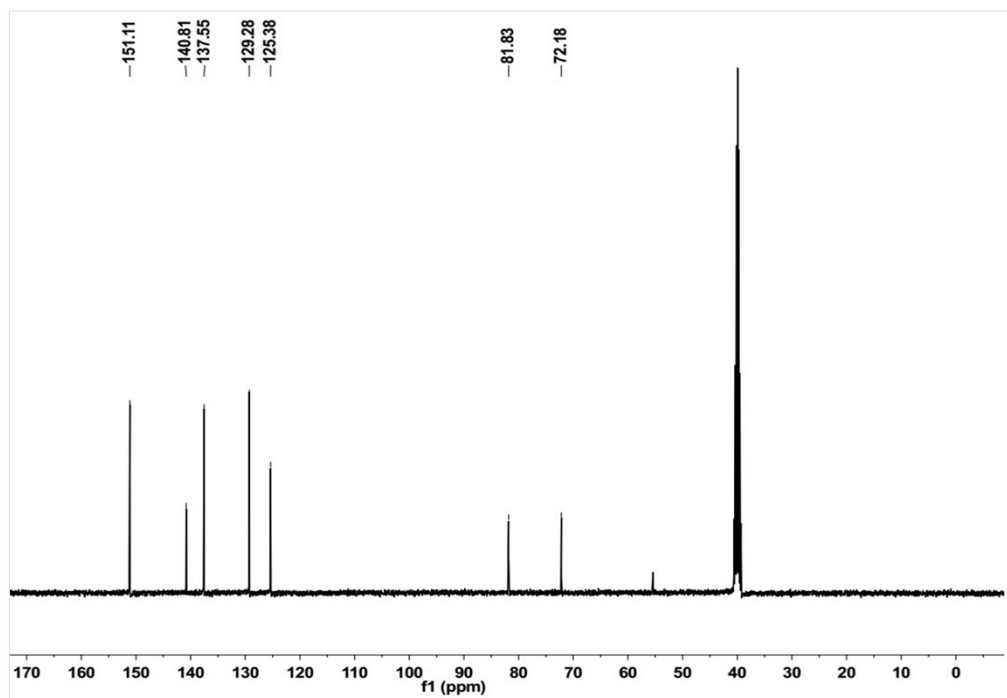

Figure S6 <sup>1</sup>H NMR and <sup>13</sup>C NMR spectrum of 1,4-di(pyridin-2-yl)buta-1,3-diyne

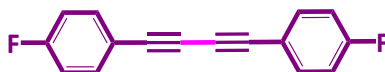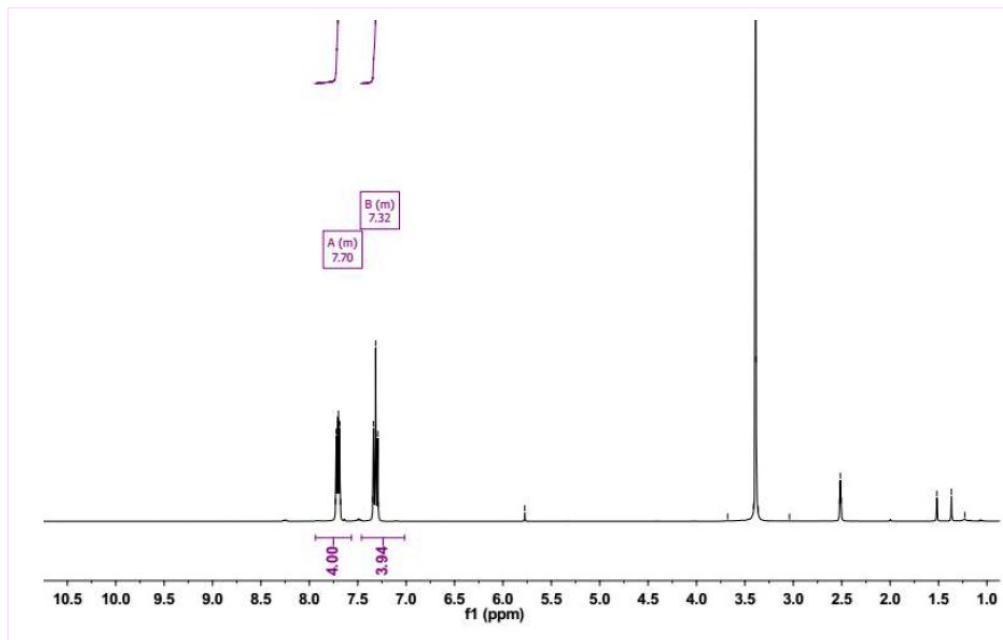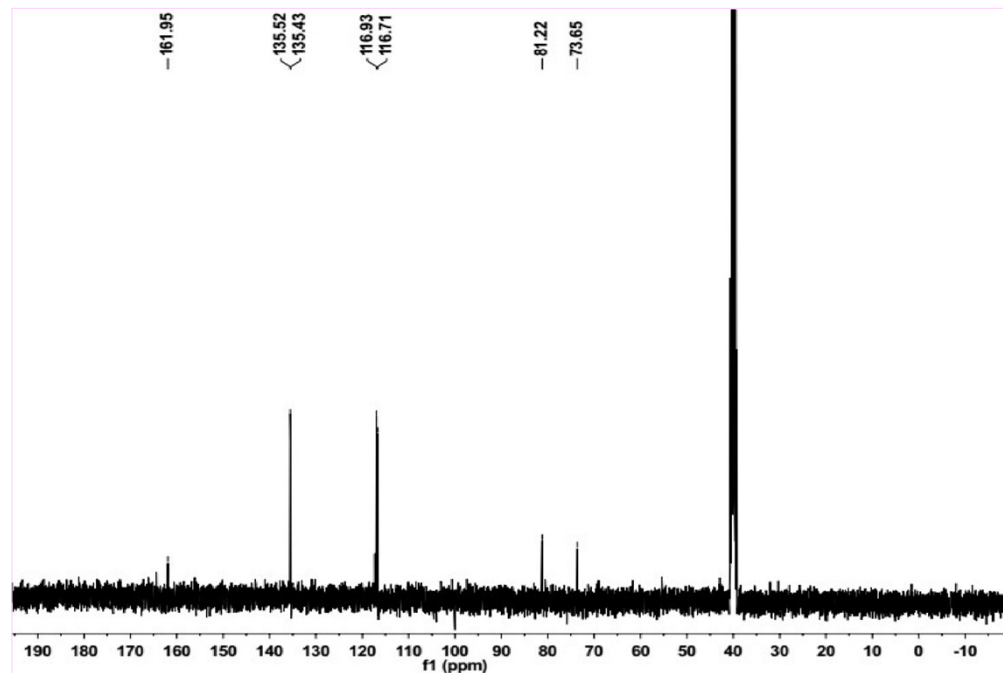

Figure S7 <sup>1</sup>H NMR and <sup>13</sup>C NMR spectrum of 1,4-bis(*p*-fluorophenyl)buta-1,3-diyne

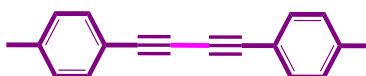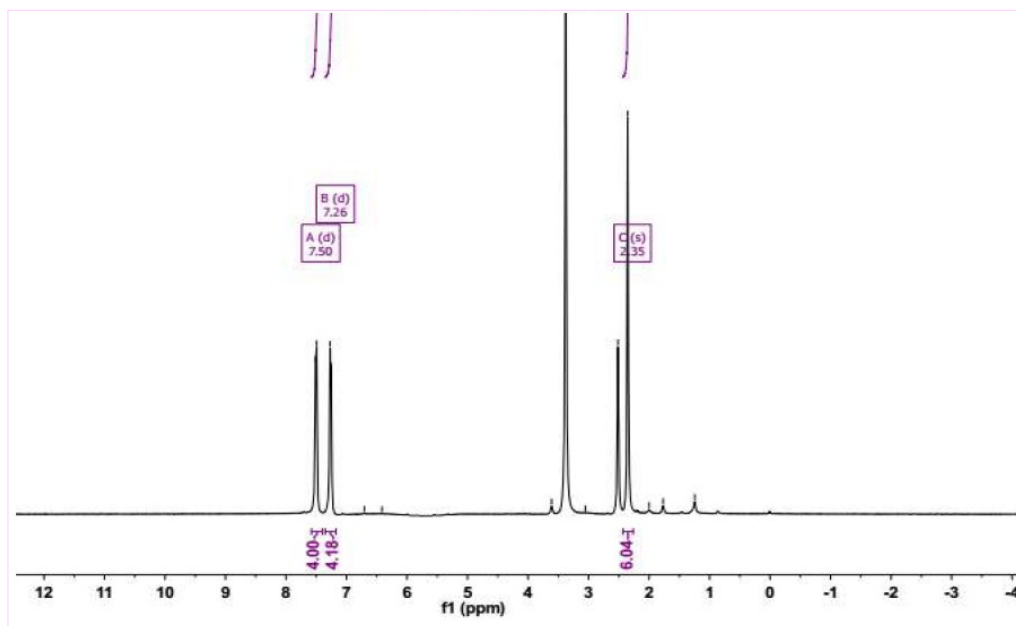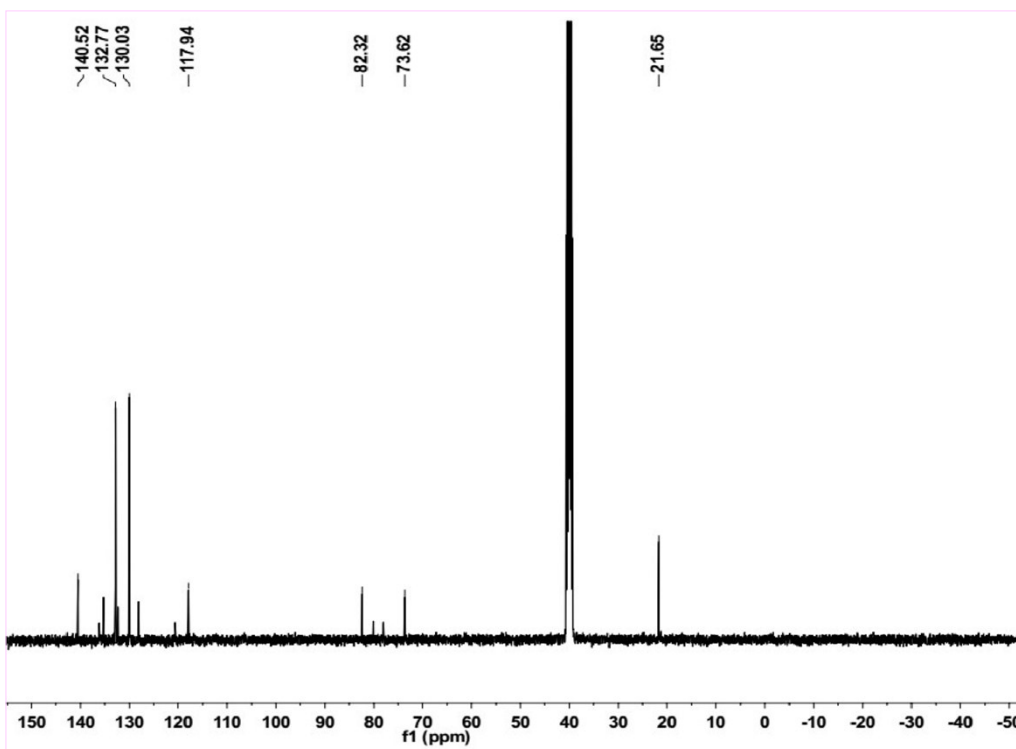

Figure S8 <sup>1</sup>H NMR and <sup>13</sup>C NMR spectrum of 1,4-bis(*p*-tolyl)buta-1,3-diyne

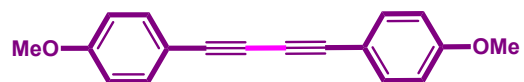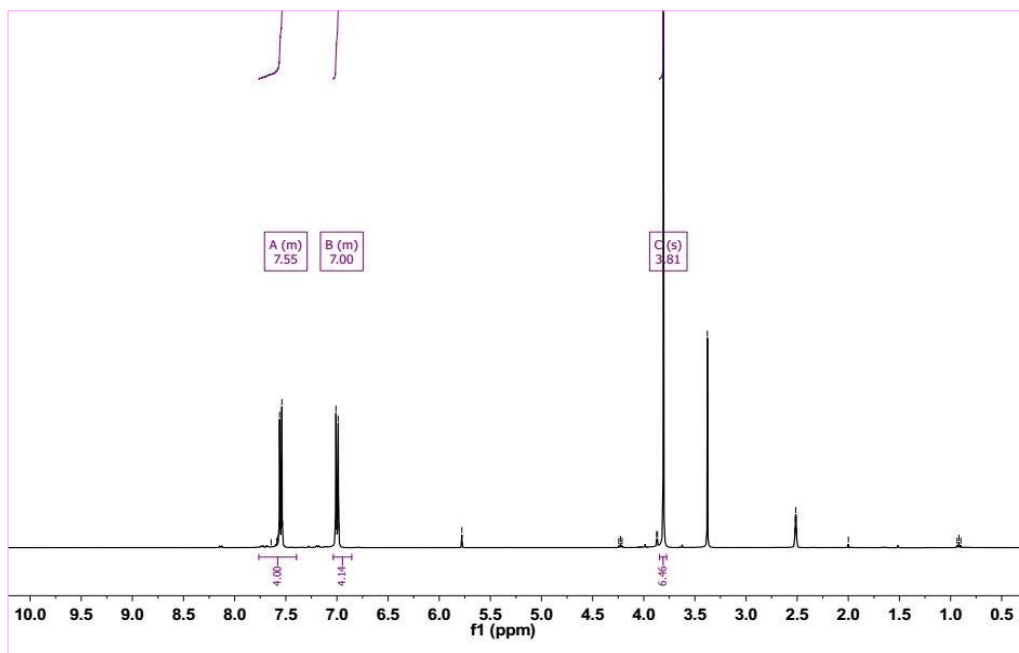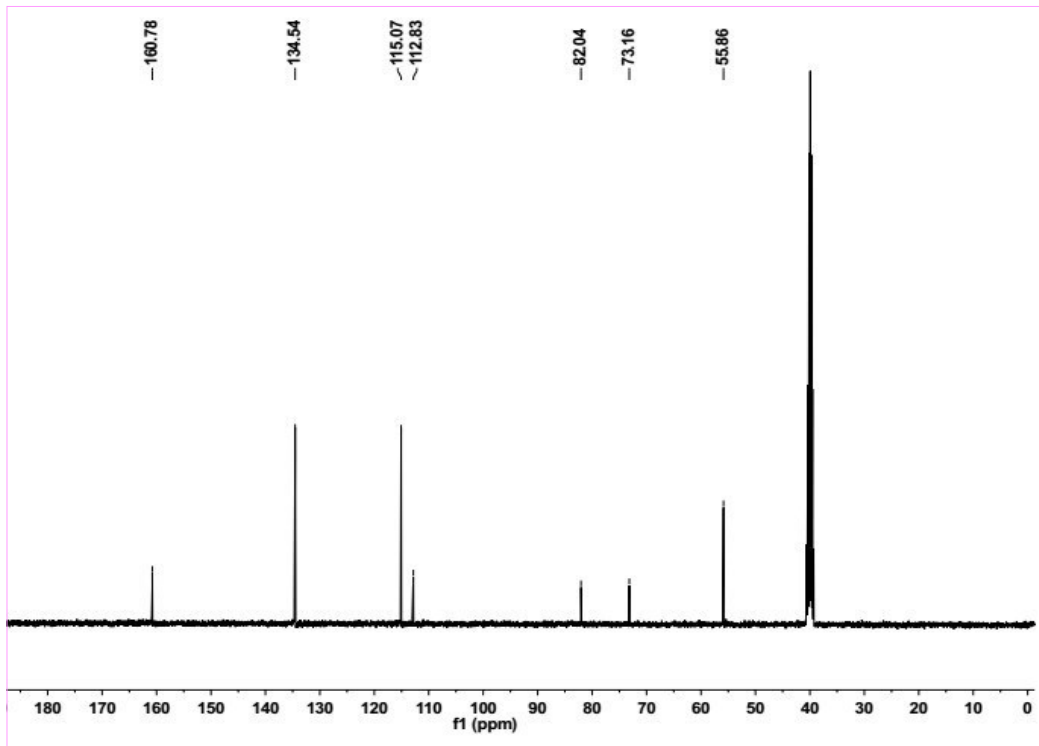

Figure S9 <sup>1</sup>H NMR and <sup>13</sup>C NMR spectrum of 1,4-bis(4-methoxyphenyl)buta-1,3-diyne

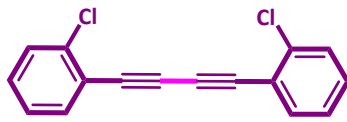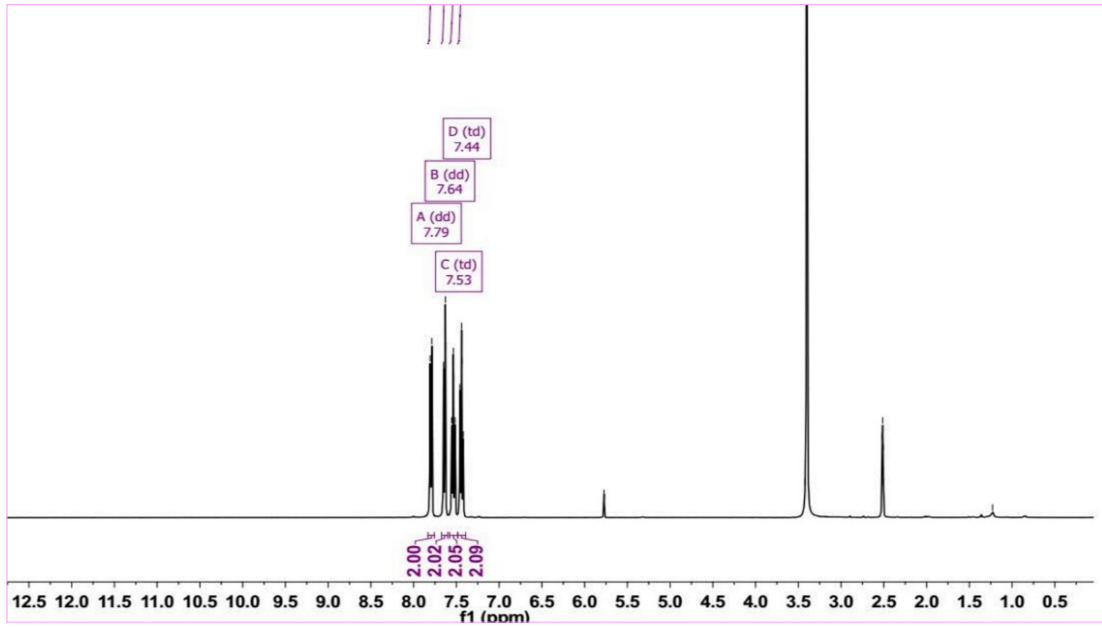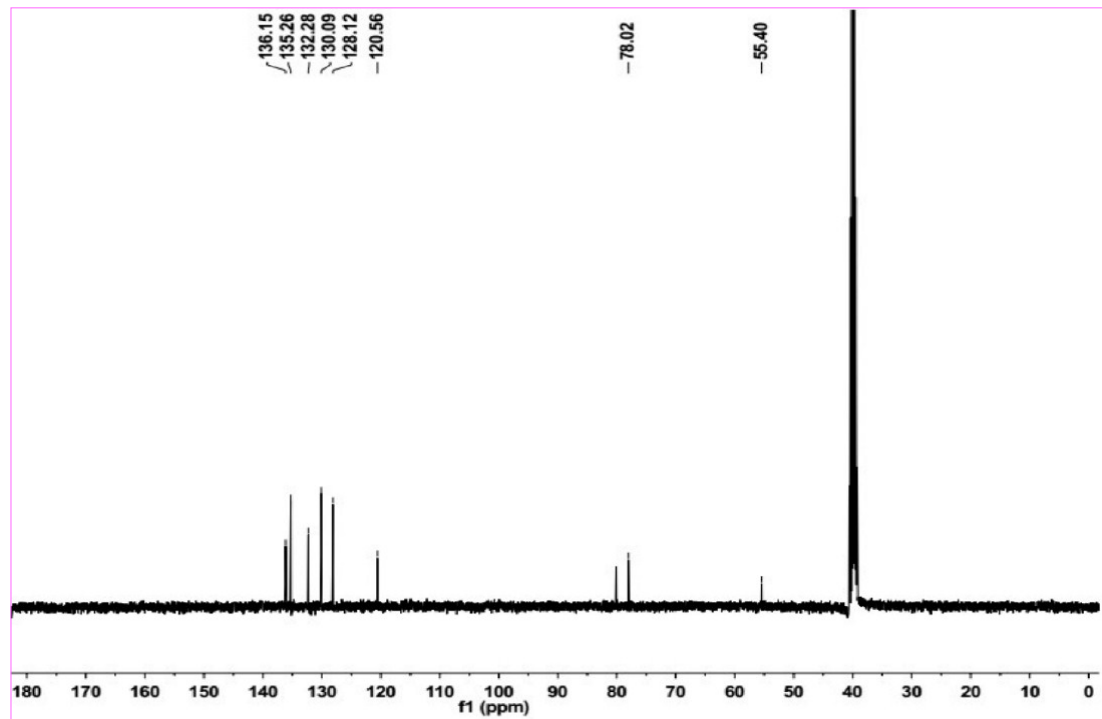

**Figure S10**  $^1\text{H}$  NMR and  $^{13}\text{C}$  NMR spectrum of 1,4-bis(2-chlorophenyl)buta-1,3-diyne
